# Supplementary material for: An improved synchronous reference frame current control strategy for a photovoltaic grid-connected inverter under unbalanced and nonlinear load conditions
Source: PLOS journal article supplement (doi:10.1371/journal.pone.0164856), 2017-02-13
Supplement: S1 (10.1371/journal.pone.0164856.s001) [file journal.pone.0164856.s001]

# Nomenclature

|                                       |                                                       |
|---------------------------------------|-------------------------------------------------------|
| $u$                                   | Grid voltage                                          |
| $P$                                   | Real power injected                                   |
| $Q$                                   | Reactive power injected                               |
| $\theta$                              | Phase estimation                                      |
| $C$                                   | Capacitor                                             |
| $\omega$                              | Frequency of rotation of the reference frame in rad/s |
| $L$                                   | Transformation matrix                                 |
| $i_{ref}$                             | Reference current                                     |
| $\omega_{ff}$                         | Frequency of rotation of the reference feed forward   |
| $V_{DC}$                              | DC-link capacitor voltage                             |
| $P_{in}$                              | Input power                                           |
| $P_{out}$                             | Output power                                          |
| $PI$                                  | Proportional integral                                 |
| $K_P$ and $K_I$                       | PI controller constants                               |
| $i_a, i_b$ and $i_c$                  | Three-phase load currents                             |
| $\overline{I_d}$ and $\overline{I_q}$ | Fundamental active and reactive current components    |
| $\tilde{I_d}$ and $\tilde{I_q}$       | Harmonic active and reactive current components       |
| $i_{sa}^*, i_{sb}^*$ and $i_{sc}^*$   | Extracted reference current signal                    |
| $v_d$ and $v_q$ $dq$                  | Voltages at the point of common coupling              |
| $I_d$ and $I_q$ $dq$                  | Currents at the point of common coupling              |
| $I_d^*$ and $I_q^*$ $dq$              | Reference currents                                    |
